# Supplementary material
Source: publisher figshare collection journal article supplement (https://tandf.figshare.com/ndownloader/files/13685927)
Supplement: Supplementary file 1 [file 13685927]

Appendix

Members of the BDD Study Group at the time of the study

Bengt-Olof Samuelsson (Borås), Kalle Snellman (Eskilstuna), Anna Olivecrona (Falun), Åke Stenberg (Gällivare), Lars Skogsberg (Gävle), Gun Forsander (Göteborg), Nils Östen Nilsson (Halmstad), Jan Neiderud (Helsingborg), Torun Torbjörnsdotter (Huddinge), Thomas Hägg (Hudiksvall), Kristina Hemmingsson (Härnösand), Karin Åkesson (Jönköping), Göran Lundström (Kalmar), Magnus Ljungcrantz (Karlskrona), Maria Forssberg (Karlstad), Karin Larsson (Kristianstad), Christer Gundewall (Kungsbacka), Rebecka Enander (Lidköping), Ulf Samuelsson (Linköping), Annelie Carlsson (Lund), Anita Nilsson (Malmö), Helena E. Larsson (Malmö), Agneta Brännström (Luleå), Maria Nordwall (Norrköping), Lennart Hellenberg (Nyköping), Elena Lundberg (Skellefteå), Henrik Tollig (Skövde), Britta Björsell (Sollefteå), Eva Örtqvist (Stockholm/KS), Björn Rathsman (Sachsska, Stockholm), Björn Stjernstedt (Sundsvall), Nils Wramner (Trollhättan), Ragnar Hanås (Uddevalla), Ingemar Swenne (Uppsala), Margareta Blomgren (Visby), Anders Thåström (Västervik), CG Arvidsson (Västerås), Stig Edvardsson (Växjö), Björn Jönsson (Ystad), Torsten Gadd (Ängelholm), Jan Åman (Örebro), Rein Florell (Örnsköldsvik), and Anna-Lena Fureman (Östersund).
